# Supplementary material for: Assessment of Knowledge, Attitude, and Practice of Antibiotic Use among the Population of Boyolali, Indonesia: A Cross-Sectional Study
Source: MDPI journal article supplement (doi:10.3390/ijerph18168258), 2021-08-04
Supplement: s1 [file s1]

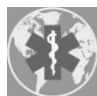

## Supplementary Table S1

### KNOWLEDGE, ATTITUDE, AND PRACTICES TOWARDS ANTIBIOTICS QUESTIONNAIRE (KAPAQ)

#### Part I. Knowledge of antibiotics

Answer the following statement by marking (✓) with the answer that you think is correct.

| No | Statement                                                                           | Yes | No | Do not know |
|----|-------------------------------------------------------------------------------------|-----|----|-------------|
| 1  | Amoxicillin is an antibiotic.                                                       |     |    |             |
| 2  | Supertetra® is antibiotic.                                                          |     |    |             |
| 3  | Paracetamol is antibiotic.                                                          |     |    |             |
| 4  | Antibiotics are used to kill bacteria.                                              |     |    |             |
| 5  | Antibiotics can be used to treat infections due to viruses.                         |     |    |             |
| 6  | Colds and flu can be cured without antibiotics.                                     |     |    |             |
| 7  | Antibiotics can reduce fever.                                                       |     |    |             |
| 8  | Antibiotics can be bought online.                                                   |     |    |             |
| 9  | Antibiotics from other people may be taken.                                         |     |    |             |
| 10 | Amoxicillin can be purchased at a pharmacy without a doctor's prescription.         |     |    |             |
| 11 | Antibiotics can be purchased at the grocery shop.                                   |     |    |             |
| 12 | Inappropriate use of antibiotics will cause antibiotic resistance.                  |     |    |             |
| 13 | inappropriate use of antibiotics will cause these antibiotics cannot be used later. |     |    |             |
| 14 | Inappropriate use of antibiotics can cause more severe illness.                     |     |    |             |
| 15 | Inappropriate use of antibiotics increases costs.                                   |     |    |             |
| 16 | Antibiotics can cause allergic reactions such as redness of the skin.               |     |    |             |
| 17 | Antibiotics can kill good bacteria in the intestines.                               |     |    |             |
| 18 | Antibiotics need to be stored in case of illness in the future.                     |     |    |             |
| 19 | Antibiotics leftover can be used again if sick.                                     |     |    |             |
| 20 | Antibiotics can be stopped if the ill has improved.                                 |     |    |             |

#### Part II Attitude towards antibiotics

Please mark (✓) in the box that best suits you with SD choice: strongly disagree, D: disagree, N: doubtful, A: agree, SA: strongly agree

| No | Statement                                                                                                | SD | D | N | A | SA |
|----|----------------------------------------------------------------------------------------------------------|----|---|---|---|----|
| 1  | I hope the pharmacist gives me amoxicillin when I buy it at the pharmacy without a doctor's prescription |    |   |   |   |    |
| 2  | If I get sick, I will buy antibiotics at a grocery shop                                                  |    |   |   |   |    |
| 3  | I am happy when I can buy antibiotics at the pharmacy without a physician's prescription                 |    |   |   |   |    |
| 4  | When I do not get antibiotics from the doctor, I will buy antibiotics at the pharmacy                    |    |   |   |   |    |
| 5  | I will be disappointed when I get treatment but I do not get antibiotics                                 |    |   |   |   |    |

| No | Statement                                                                                | SD | D | N | A | SA |
|----|------------------------------------------------------------------------------------------|----|---|---|---|----|
| 6  | Using leftover antibiotics will save money because I do not need to see a doctor         |    |   |   |   |    |
| 7  | I will keep the leftover antibiotics because they are useful in the future               |    |   |   |   |    |
| 8  | I will give my leftover antibiotics to others to help cure him                           |    |   |   |   |    |
| 9  | I will take antibiotics until they run out even though my sick has improved              |    |   |   |   |    |
| 10 | If I feel better, I will stop taking antibiotics                                         |    |   |   |   |    |
| 11 | When I have a cold, I hope the doctor gives me antibiotics                               |    |   |   |   |    |
| 12 | I will take antibiotics in the hope that antibiotics can speed up the healing of my cold |    |   |   |   |    |

### Part III Practice using antibiotics

For each statement, please mark (✓) that suits you (N: never, SD: seldom, S: sometimes, O: often, A: always).

| No | Statement                                                                           | N | SD | S | O | A |
|----|-------------------------------------------------------------------------------------|---|----|---|---|---|
| 1  | I bought antibiotics at a grocery shop                                              |   |    |   |   |   |
| 2  | I bought antibiotics online                                                         |   |    |   |   |   |
| 3  | I bought amoxicillin at the pharmacy without a doctor's prescription                |   |    |   |   |   |
| 4  | I take leftover antibiotics when I feel sick with the same symptoms                 |   |    |   |   |   |
| 5  | I get antibiotics from the midwife                                                  |   |    |   |   |   |
| 6  | I get antibiotics from other people                                                 |   |    |   |   |   |
| 7  | I get antibiotics from the nurse                                                    |   |    |   |   |   |
| 8  | When my family is sick, I recommend buying antibiotics                              |   |    |   |   |   |
| 9  | I use antibiotics because of advice from others                                     |   |    |   |   |   |
| 10 | I take antibiotics until finish                                                     |   |    |   |   |   |
| 11 | I stop taking antibiotics if my condition improves                                  |   |    |   |   |   |
| 12 | I take antibiotics to speed up the healing of my cold                               |   |    |   |   |   |
| 13 | I take antibiotics to treat runny nose, colds, tired aches, rheumatic pain, and flu |   |    |   |   |   |

### Part IV: Demographic information

Answer the following questions by filling in the blanks (no. 1 to 3) and marking (✓) in the box provided following your conditions.

|   |                       |                                                                                                                                                                                                                                                                                                                 |
|---|-----------------------|-----------------------------------------------------------------------------------------------------------------------------------------------------------------------------------------------------------------------------------------------------------------------------------------------------------------|
| 1 | Name                  |                                                                                                                                                                                                                                                                                                                 |
| 2 | Age                   |                                                                                                                                                                                                                                                                                                                 |
| 3 | address/mobile number |                                                                                                                                                                                                                                                                                                                 |
| 4 | Gender                | <input type="checkbox"/> Male <input type="checkbox"/> Female                                                                                                                                                                                                                                                   |
| 5 | Level education       | <input type="checkbox"/> No formal education<br><input type="checkbox"/> Elementary school<br><input type="checkbox"/> Junior high school<br><input type="checkbox"/> Senior high school<br><input type="checkbox"/> Diploma<br><input type="checkbox"/> Undergraduate<br><input type="checkbox"/> Postgraduate |
| 6 | Monthly income        | <input type="checkbox"/> <IDR.1.600.000                                                                                                                                                                                                                                                                         |

|   |                |                                                                                                               |
|---|----------------|---------------------------------------------------------------------------------------------------------------|
|   |                | <input type="checkbox"/> IDR.1.600.000-Rp.3.000.000<br><input type="checkbox"/> >IDR.3.000.000                |
| 7 | Marital Status | <input type="checkbox"/> Married<br><input type="checkbox"/> Single<br><input type="checkbox"/> Widow/widower |

IDR: Indonesian rupiah
